# Supplementary material for: Skeletal muscle Nur77 expression enhances oxidative metabolism and substrate utilization
Source: PubMed Central journal article supplement — J Lipid Res. 2012 Dec;53(12):2610–9. doi: 10.1194/jlr.M029355 (PMC3494265; doi:10.1194/jlr.m029355), 2012-12

## Supplemental Figure Legends

Figure S1. Gene expression of Fbp2 (A) and myosin heavy chain (Myh) 1 and 2 (B) in MCK-Nur77 transgenic gastrocnemius muscle, measured by quantitative PCR. N = 4 to 8, 3 months old, male. \* P<0.001.

Figure S2. Body composition and glucose tolerance of MCK-Nur77 transgenic mice. A. Body weight on chow diet. N = 7 to 8, 4 months old, male. B. Body composition of mice fed a chow diet. N = 7, 7 months old, male. C. Intraperitoneal glucose tolerance test performed after one month of high-fat diet (45% calories from fat). N=7 to 8, 5 months old, male. D. Fasting insulin level of mice in C.

Figure S3. Expression of mitochondrial fusion and fission genes in MCK-Nur77 extensor digitorum longus muscle. A. Gene expression determined by quantitative PCR. B. Immunoblot of transgenic muscle lysates. Lamin A/C used as loading control. N = 7 to 9, male. \* P<0.05, \*\* P<0.01, \*\*\* P<0.001.

Figure S4. Gene expression of Nur77-transgenic mice after 7 hours of cold exposure. A. Nur77 transgene was not expressed in brown adipose tissue (BAT). B. Brown adipose tissue markers were not changed in brown adipose tissue of transgenic mice after cold exposure. N = 7, 6 to 8 months old, male.

Supplemental Table 1. Mouse primers used for real-time PCR. Sequences are listed from 5' to 3'.

| Gene  | GeneBank ID    | Primer | SEQUENCE                  |
|-------|----------------|--------|---------------------------|
| Tnni1 | NM_021467.4    | For    | GCCGGAAGTTGAGAGGAAAT      |
|       |                | Rev    | CTTGGCCTTGGCTAGCATC       |
| Tnni2 | NM_009405.1    | For    | GAGATGAGGAGAAGCGCAAC      |
|       |                | Rev    | CGCTATCTGGAGCATCACAC      |
| Myh1  | NM_030679.1    | For    | AATCAAAGGTCAAGGCCTACAA    |
|       |                | Rev    | GAATTTGGCCAGGTTGACAT      |
| Myh2  | NM_001039545.1 | For    | AAATCTTACAAGAGACAAGCTGAGG |
|       |                | Rev    | TGCGGAACTTGGATAGATTTG     |
| Myh4  | NM_010855.2    | For    | TGGCCGAGCAAGAGCTAC        |
|       |                | Rev    | TTGATGAGGCTGGTGTCTG       |
| Myh7  | NM_080728.2    | For    | CGCATCAAGGAGCTCACC        |
|       |                | Rev    | CTGCAGCCGCAGTAGGTT        |
| Fbp2  | NM_007994.3    | For    | AGAAAGACCACGGAGGACGA      |
|       |                | Rev    | CCCGCAGCCACGATGT          |
| Pdk4  | NM_013743.2    | For    | CGCTTAGTGAACACTCCTTCG     |
|       |                | Rev    | CTTCTGGGCTCTTCTCATGG      |
| Pgc1a | NM_008904      | For    | GAAAGGGCCAAACAGAGAGA      |
|       |                | Rev    | GTAAATCACACGGCGCTCTT      |
| Erra  | NM_007953.2    | For    | CCTTCCCTGCTGGACCTC        |
|       |                | Rev    | CGACACCAGAGCGTTCCT        |
| Tfam  | NM_009360      | For    | ACAATGAAATGAAGTCTTGGGAAG  |

|        |              |     |                          |
|--------|--------------|-----|--------------------------|
|        |              | Rev | TGTCTCCGGATCGTTTCACA     |
| Nrf1   | NM_001164229 | For | GCAGCACCTTTGGAGAATGTG    |
|        |              | Rev | GCCAGAGCAGACTCGAGGTC     |
| Nrf2   | NM_008065.2  | For | CCGCTACACCGACTACGATT     |
|        |              | Rev | ACCTTCATCACCAACCCAAG     |
| Elovl3 | NM_007703    | For | TCCGCGTTCTCATGTAGGTCT    |
|        |              | Rev | GGACCTGATGCAACCCTATGA    |
| Ucp1   | NM_009463    | For | CAGAATGCAAGCCCAGAGC      |
|        |              | Rev | AAGCATTGTAGGTCCCCGTGT    |
| Dio2   | NM_010050    | For | CAGTGTGGTGCACGTCTCCAATC  |
|        |              | Rev | TGAACCAAAGTTGACCACCAG    |
| Mfn1   | NM_024200    | For | ATGGCAGAAACGGTATCTCCA    |
|        |              | Rev | CTCGGATGCTATTCGATCAAGTT  |
| Mfn2   | NM_133201.2  | For | CGAGGCTCTGGATTCACTTC     |
|        |              | Rev | CAACCAGCCAGCTTTATTCC     |
| Opal   | NM_133752.2  | For | ACCAGGAGAAGTAGACTGTGTCAA |
|        |              | Rev | TCTTCAAATAAACGCAGAGGTG   |
| Drp1   | NM_152816.2  | For | GCTAGTCCACGTTTCACCAGA    |
|        |              | Rev | TCCATGTGGCAGGGTCAT       |
| Fis1   | NM_025562.3  | For | TGGTGTCTGTGGAGGATCTG     |
|        |              | Rev | ATTGCGTGCTCTTGGACAC      |

**A**

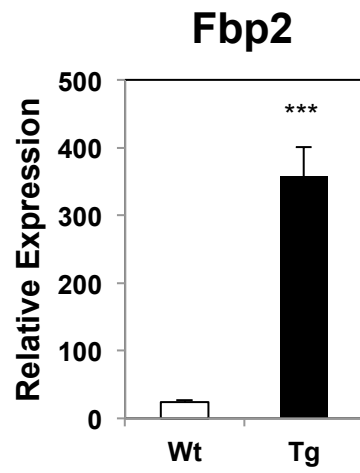

**B**

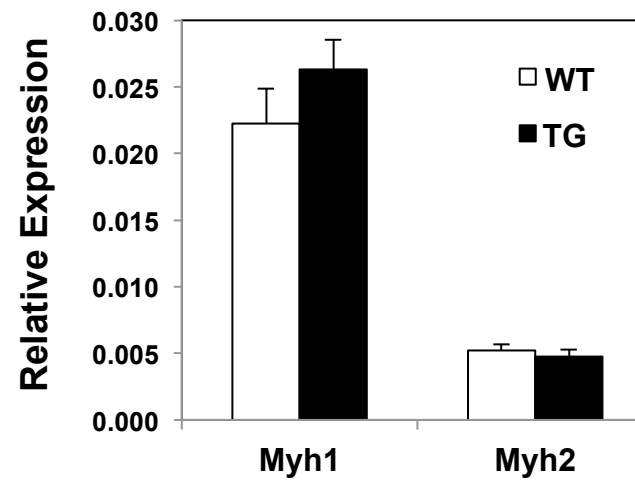

**A**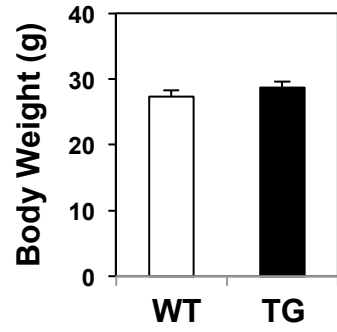**B**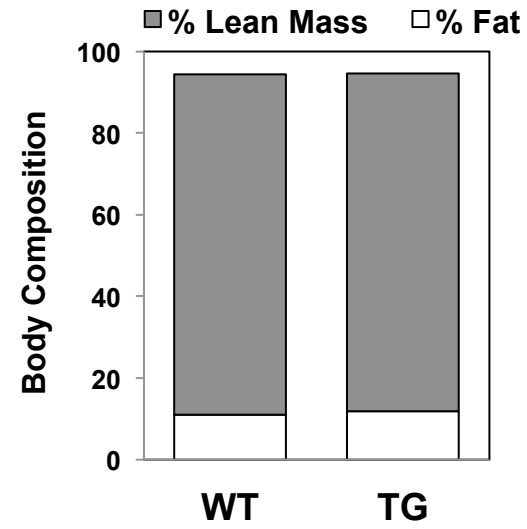**C**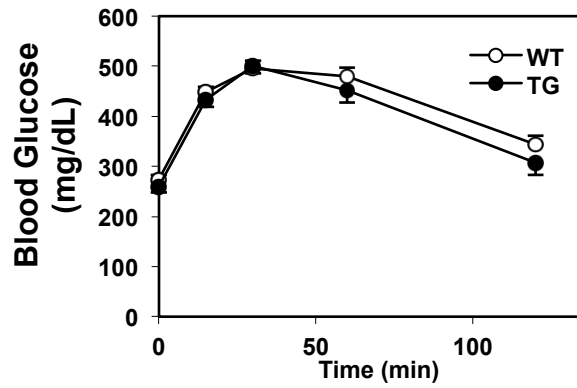**D**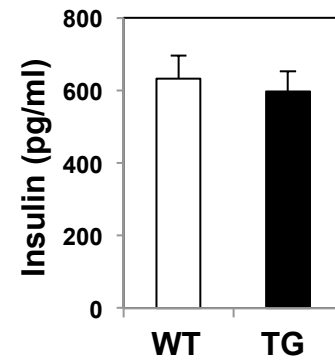

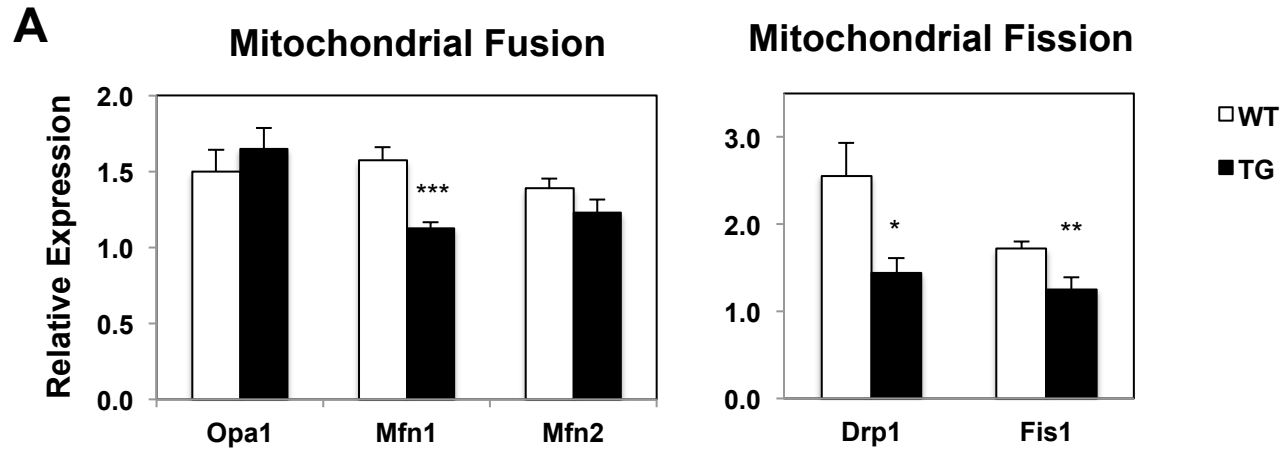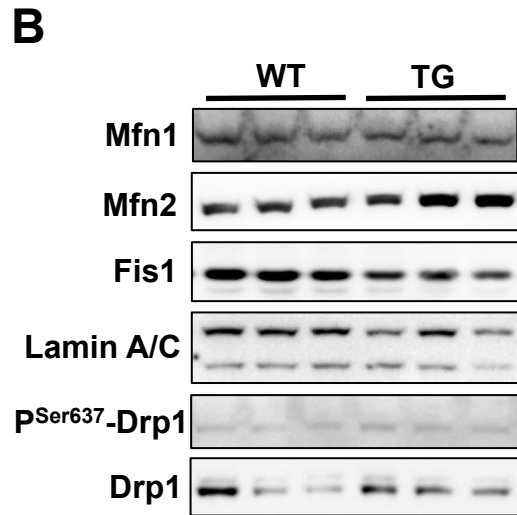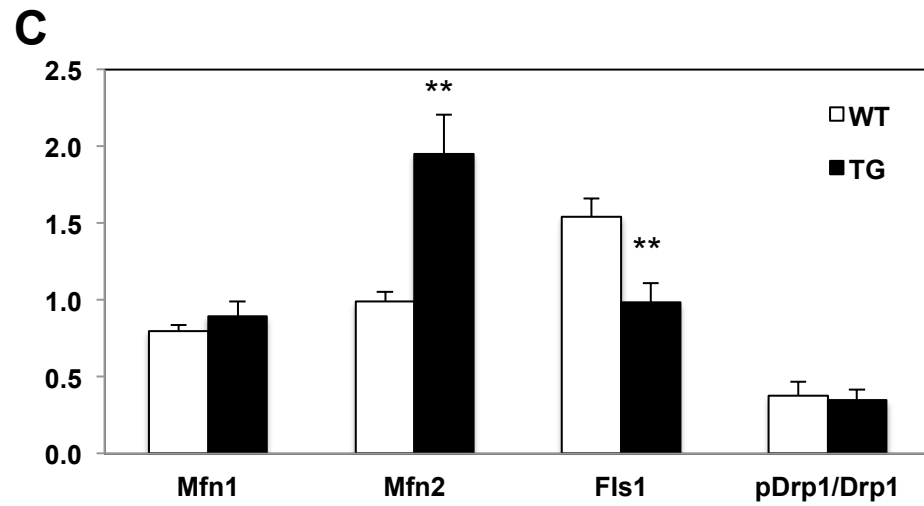

**A**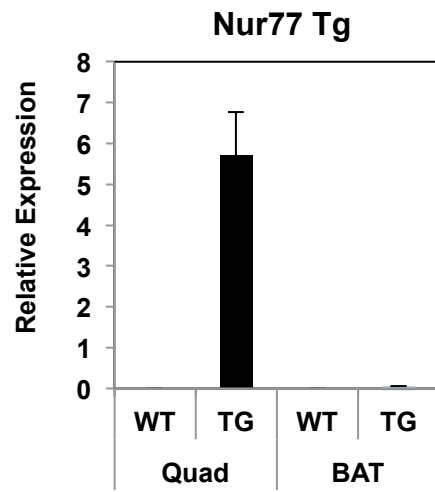**B**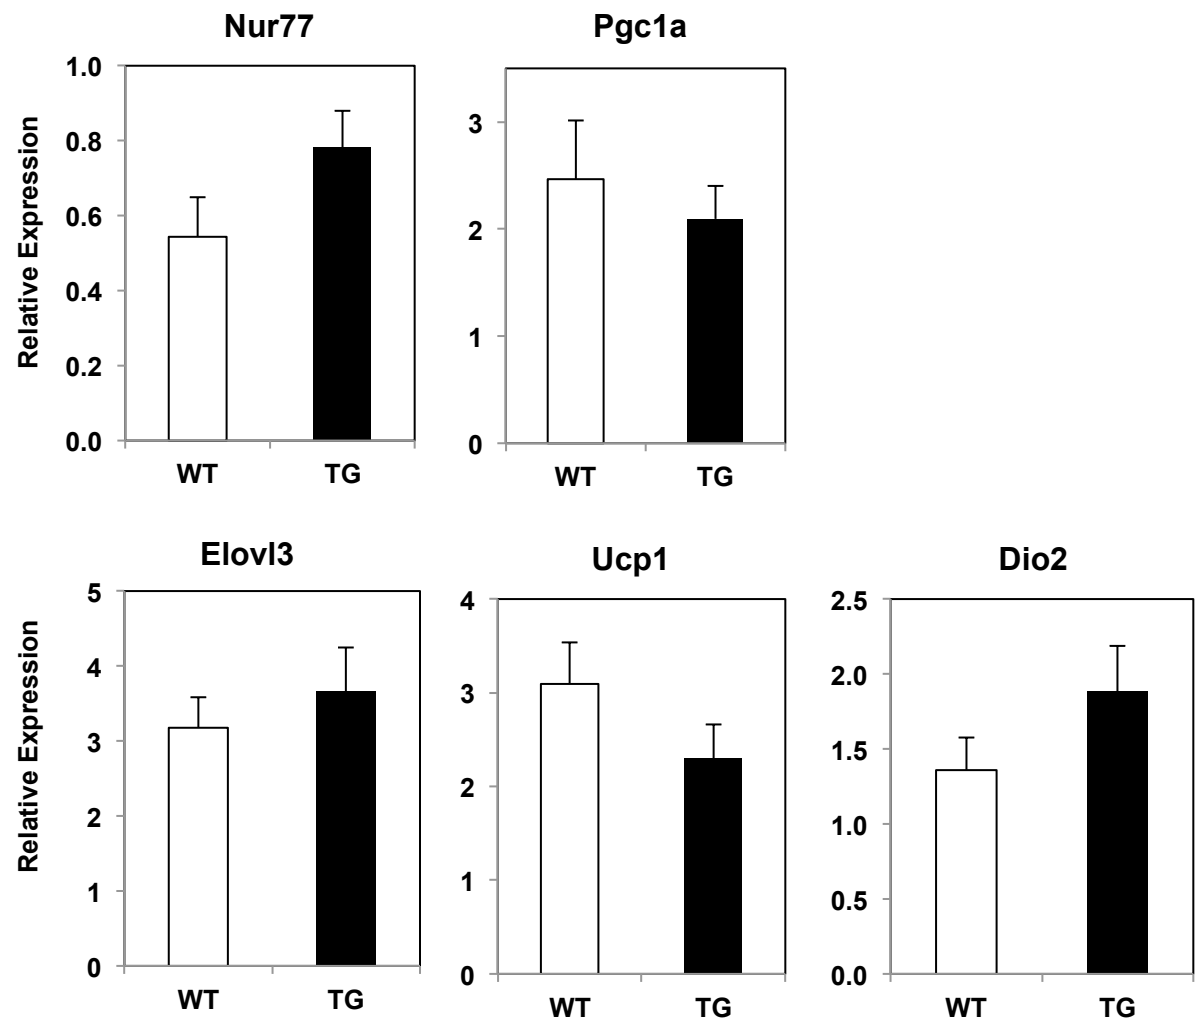

Supplement: supp_M029355_jlr.M029355-1.pdf [file supp_M029355_jlr.M029355-1.pdf]
